# Supplementary material
Source: PubMed Central journal article supplement (PMC6865719)
Supplement: HBM-40-1554-s001.pdf [file HBM-40-1554-s001.pdf]

## **Gradual acquisition of visuo-spatial associative memory representations via the dorsal precuneus**

Björn H. Schott, Torsten Wüstenberg, Eva Lücke, Ina-Maria Pohl, Anni Richter, Constanze I. Seidenbecher, Stefan Pollmann, Jasmin M. Kizilirmak, and Alan Richardson-Klavehn

### **Supporting Online Information**

#### **Supplementary Methods**

##### **Analysis of the session-specific and run-specific head motion**

We assessed the head motion characteristics over different experimental sessions by means of the six parameter estimates for within scan translation and rotation. In addition, we computed between-scan Euclidean distances (only for translation). Separate 3 x 3 ANOVAs for repeated measures were performed for the individual means of these parameters (Figure S1, Table S1). We report F-values and effect sizes for these analyses. Degrees of freedom were corrected for non-sphericity, using the Greenhouse-Geisser correction when appropriate.

##### **Selection of coordinates and generation of regions of interest**

Specific regions of interest (ROIs) for the mPFC (Table S2) and for dorsal and ventral precuneus (Figure S2; Table S3, S4) were generated based on previous studies, using a combined anatomical and functional (i.e., literature-based) approach. Coordinates were obtained from previously published fMRI studies. To this end, we conducted a PubMed search with the search term “precuneus AND memory AND (encoding OR retrieval) AND fMRI” plus approximately 10 references familiar to the authors. Of the resulting >600 hits, 156 studies were considered suitable based on the abstracts, and coordinates were ultimately obtained from 101 references. Coordinates of the ventral precuneus (N = 174; see Table S3) were obtained, for example, from recollection-based recognition, negative subsequent memory effects and autobiographical retrieval, whereas coordinates of the dorsal precuneus (N = 175; see Table S4) stemmed from processes like navigation and spatial memory, visual imagery or familiarity-based recognition. Furthermore, we selected 19 coordinates from studies of schema-dependent memory formation to obtain a probabilistic ROI of the mPFC (Table S2). The distributions of thus obtained coordinates was fit as three-dimensional Gaussian ellipsoids, limited to voxels within the 2 SD borders of these Gaussian models (Schubert et al., 2008; Schott et al., 2013). Due to overlapping ellipsoids for ventral and dorsal coordinate sets, the final ROIs (with respect to the border between precuneus

sub-regions) were computed by means of a maximum probability approach. Finally, we inclusively masked the resulting ROIs with anatomical boundaries obtained from the Automated Anatomical Labeling Atlas (Tzourio-Mazoyer et al., 2002). Anatomical masks were generated separately for the left and right hemisphere and consisted of medial parietal cortices (precuneus, SPL, posterior cingulate).

## **Supplementary Results**

### ***Session-specific and run-specific head motion***

Mean rigid-body movement parameters across the group are displayed in Figure S1. Of all movement parameters, only pitch showed a significant main effect of run after correction for multiple comparisons. ( $F_{1,7,53.0} = 10.60$ ;  $p < .001$ ;  $\eta^2 = .255$ ), reflecting stronger movement in the first compared to the second and third run. A trend-wise interaction between run and day (i.e. session) for pitch ( $p = .076$ , uncorrected) mostly driven by between-session differences in the first run. Importantly, no main effect of session –or day– was observed. For a detailed overview of all results see Supplementary Table S1.

### ***Region of interest analyses in the medial prefrontal cortex***

Given the previously described role of the medial prefrontal cortex (mPFC) in memory formation based on prior knowledge (van Kesteren et al., 2012), we performed ROI analyses in this region using the main contrasts of interest (congruency contrast, i.e. constant vs. shuffled on Day 2+5; subsequent memory contrast, i.e. pictures with subsequently remembered vs. forgotten icon positions). Neither the comparison of constant to shuffled configurations nor the reverse contrast showed activations in the mPFC with family-wise error correction for the ROI volume at either voxel or cluster level, even when applying the most liberal a priori significance level of  $p < .05$ , uncorrected. In the subsequent memory contrast, the ROI-based analysis in the mPFC revealed no activations during successful encoding within the mPFC that remained significant after correction for the ROI volume, even with an a priori significance level of  $p < .05$ , uncorrected.

### ***Correct, incorrect, and omitted responses across conditions and days***

Mean response profiles, separated by condition and day are reported in Supplementary Table S5 (see also Figure 1, main manuscript). In addition to the increasing proportion of correctly recognized icon positions in the constant condition (see Results section, main manuscript), proportions of incorrect and omitted responses also varied as a function of both condition and study day. While the proportion of omitted responses was slightly higher for

shuffled compared to constant configurations (main effect of condition:  $F_{1,31} = 13.85$ ,  $p = .001$ , partial  $\eta^2 = .309$ ; 2-way ANOVA for repeated measures with condition and day as within-subjects factors), omission rates decreased from day 1 to day 5 at a similar rate in both conditions (main effect of day:  $F_{2,1,65.6} = 27.78$ ,  $p < .001$ , partial  $\eta^2 = .463$ ; no condition by day interaction,  $p > .583$ ). The proportion of incorrect responses, however, showed a significant decrease from day 1 to day 5 in the constant condition ( $t_{31} = 2.93$ ,  $p = .006$ , Cohen's  $d = .517$ ), but a trend-wise increase in the shuffled condition ( $t_{31} = -1.79$ ,  $p = .083$ , Cohen's  $d = .317$ ). Uncertainty-adjusted recognition rates (correct / [1-omissions]) followed the same pattern as raw recognition rates, with a pronounced increase from day 1 to day 2 in the constant condition and a subsequently slower increase in performance from day 2 to day 5 (Table S5). As for raw recognition rates, a two-way ANOVA for repeated measures revealed main effects of condition ( $F_{1,31} = 157.94$ ,  $p < .001$ , partial  $\eta^2 = .836$ ) and day ( $F_{2,8,87.4} = 14.85$ ,  $p < .001$ , partial  $\eta^2 = .324$ ), as well as a significant interaction ( $F_{3,6,112.4} = 4.98$ ,  $p = .001$ , partial  $\eta^2 = .138$ ).

### **Background position during familiarization and memory performance on day 1**

Figure S3 depicts the average memory performance (correctly recognized icon position) for each background picture as a function of its temporal position during the familiarization phase, using a sliding window of +/-5. While there were no clear primacy or recency effects (i.e. memory advantages for the pictures presented first and last), a performance peak could be observed for the background pictures presented around positions 23 to 26, whereas a dip in performance was found for the background pictures presented around positions 44 to 52.

### **No difference in precuneus activation on day 1**

To exclude the possibility that the precuneus activation observed in the comparison of brain responses to constant versus shuffled configurations on Day 2 and 5 might be attributable to item-related effects of the background pictures as observed on Day 1, we computed a  $t$  contrast comparing the constant and shuffled conditions on Day 1 only, based on the same ANOVA model as the main contrast of interest (see Methods section of the main manuscript). At  $p < .001$ , uncorrected, minimum cluster size = 10 voxels, no significant activation differences were observed. When using a more liberal threshold of  $p < .005$ , uncorrected, minimum cluster size = 10 voxels, two activation clusters were observed in secondary visual areas (Figure S4), but none survived FWE correction at either voxel or cluster level. We further performed a ROI-based analysis in the precuneus, using *a priori* defined literature-based ROIs (Table S3, S4). Even when using an uncorrected  $p < .05$  and a minimum cluster size of 5 voxels, we observed no supra-threshold voxels within the precuneus ROIs.

## Supplementary Discussion

### ***Analysis of the session-specific and run-specific head motion***

In our analyses, the only motion parameter estimates that significantly differ between experimental runs, is the rotation around the x-axis (pitch). This parameter is known to be associated with MR signal fluctuations and image distortions in ventral frontal and temporal brain regions. Although we addressed this so called susceptibility x motion interaction by involving the motion parameter estimates in our 1<sup>st</sup> level models, a complete correction of the influence of this motion (specifically in connectivity analyses, e.g. Satterthwaite et al. 2012) is virtually impossible and might thus affect also the goodness of parameter estimation in 1<sup>st</sup> level models (due to differences in signal-to-noise ratio). However, for the runs 2 and 3 we found no differences between mean pitch estimates for Day 1, 3 and 5. Thus only in the first run, the estimation of model parameters may be affected. Because our contrast images were computed using all three runs of a session, the influence of this effect is – in our view – tolerable. Regarding possible image distortions, the position of our main effect in the dorsal precuneus is, given the absence of air-tissue borders in that region, not considered to be vulnerable for the image distortions and can be therefore neglected.

### ***Response profiles to constant and shuffled configurations***

Analysis of the response types (correct, incorrect, omissions) revealed a pattern of responses that separated constant from shuffled configurations from day 2 onwards (Figure 2, Table 1, Supplementary Table 5). In the constant condition, the most pronounced increase in correct response rates was observed from day 1 to day 2, whereas subsequent improvement was only moderate —a phenomenon that we had already observed during a behavioral piloting phase in ten healthy volunteers who did not participate in the main experiment (E.L. and B.S., unpublished observations). Such negatively accelerated learning curves are a well-known phenomenon in conditioning as described by Rescorla and Wagner (1972), and they have been observed in spatial learning experiments at different time scales (Fatima et al., 2016), and are commonly interpreted as reflecting ceiling effects. The fact that the learning rate was markedly lower on days 3-5 compared to days 1-2 probably reflects the high difficulty of the task, although it is, in our view, rather likely that participants' performance would have further improved if additional training sessions had been performed over a more extended time window (Sommer, 2017).

While the performance increase in the constant condition was highly expected, shuffled configurations were also associated with a distinctive development of participants' response patterns from day 1 to day 5. While only a marginal increase of correct response rates could be observed, participants did show a continuous decrease in response omission

and a corresponding increase in incorrect response rates (Supplementary Table S5). One possible explanation for this response pattern may be associative interference from repeatedly presented icons. As described in the methods section, icons were presented in three to seven different configurations, and different positions of the same icon in other trials. As the same icon could be presented in both conditions, we suspect that, while interference might have arisen particularly from the stronger representations of the constant condition, as, for example, commonly observed with the retrieval-practice paradigm and the phenomenon of retrieval-induced forgetting and strength-dependent interference (Anderson, Bjork, & Bjork, 1994; Bäuml, 1997; Wimber et al., 2011; Verde, 2013).

### ***A non-linear relationship between icon position during familiarization and memory performance on Day 1***

An unexpected result of our analyses was a significant difference in memory performance between the constant and the shuffled conditions already on day 1 (see Table 1 of the main manuscript). Detailed control analyses showed that the only difference between (subsequently) constant and (subsequently) shuffled items on day 1 was the serial position of the background pictures during the familiarization phase. While we acknowledge that the performance difference constitutes a limitation, particularly with respect to extrastriate activations (Supplementary Figure S4), this incidental observation also highlights the importance of the background pictures in the learning process. As icons were not unique to a specific configuration, merely studying the icon configurations, ignoring the background pictures, would have been highly unlikely to result in a performance difference on day 1.

Effects of temporal –or serial– position on memory performance are a well-known phenomenon and occur most prominently as primacy and recency effects that have been observed in several different species (Wright et al., 1985). In the present study, no classic primacy or recency effects of the serial position of background pictures during familiarization could be observed on recognition performance on day 1. As depicted in Figure S3, the relationship between the temporal position of the background pictures during familiarization and recognition of the configurations on Day 1 was nevertheless not random. The pattern shown in Figure S3 is suggestive for the relationship being best characterized by a slow drift with a negative slope and superimposed oscillatory fluctuations. Brain states during (Otten et al., 2002) or even before (Guderian et al., 2009) the occurrence of an item have been associated with successful explicit memory formation, and it is tempting to conclude that a fluctuation of such states may underlie the observed relationship between serial position and memory performance. However, given the lack of an *a priori* hypothesis regarding this incidental observation and the thus far descriptive nature of the observed relationship, future studies need to be conducted to systematically investigate this intriguing possibility.

**Brain-behavior correlations and statistical power**

We observed a positive correlation between the BOLD response of the precuneus during presentation of constant versus shuffled configurations and the recognition rate of the (altered) configurations in the delayed memory test (Figure 5, main manuscript). While this observation further supports the notion that the precuneus actually supports long-term memory for visuo-spatial information, it must be noted that brain-behavior correlations have been criticized in the recent years for various reasons. Most prominently, Vul and colleagues (2009) have demonstrated that, particularly in social neuroscience, brain-behavior correlations have been commonly based on non-independently selected sets of voxels (“double-dipping”), resulting in inflated correlation coefficients and significance levels. In the present study, we had selected the peak voxel from a one-sample *t*-test at group level testing the contrasts between the two conditions (constant and shuffled) on Day 2 and 5 at the single-subject level against zero. It was thus selected independently from the behavioral measure of interest (recognition in the delayed memory test). Another issue that has been raised with respect to brain-behavior correlations is the common occurrence of outliers, which have been shown to increase the risk for false-positive correlations (Rousselet and Pernet, 2012). Several methods have been proposed to detect and exclude outliers (Rousselet and Pernet, 2012; Schwarzkopf et al., 2012). In our study, outlier exclusion using Shepherd’s *Pi* correlation (Schwarzkopf et al., 2012) did not affect the sign or significance of the correlation between precuneus activation during study of constant configurations and delayed recognition rate.

Nevertheless, the sample size may constitute a limitation. In a commentary to the widely cited work by Vul and colleagues (2009), Yarkoni (2009) argued that correlational analyses inherently bear a more fundamental problem, namely their substantially lower statistical power in comparison to *t* statistics. According to the simulations performed by Yarkoni (2009), the power to detect a correlation of  $r = .4$  with a significance level of  $p < .05$ , as in the present study, would be approximately .6 in a population of 30 participants, but the power would drop to about .2 when assuming that the true  $r$  was closer to .2 (see Yarkoni, 2009, Figure 1). Yarkoni pointed to the risk of low power leading not only to under-reporting of small, but significant effects, but also to inflated  $r$  values and to effects appearing more circumscribed than they truly are. Button and colleagues (2013) have further pointed out that low power increases the risk of reporting false positive results, as it decreases the positive predictive value. Therefore, given the moderate sample size in our study ( $N = 31$ ), we consider the positive correlation of precuneus activation and delayed memory performance as additional evidence for a critical role of the precuneus in spatial associative memory, but we acknowledge that the result must be interpreted with some caution.

## Supplementary Figures

**Figure S1:** Plots of session- and run-specific, mean motion parameter estimates. *Abbreviations: transX, transY, transZ – translation parallel to the x, y and z-axis respectively, transED – translation associated Euclidean distances.*

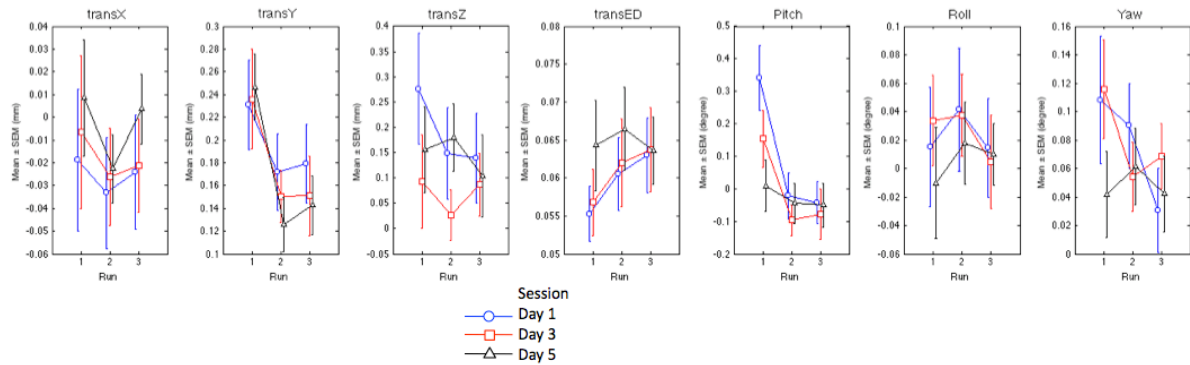

**Figure S2:** Literature-based anatomical parcellation of the precuneus. Panel (A): Fitted 3D-gaussians for the dorsal and ventral coordinate set. (B) Final binarized regions of interest (ROIs), additionally masked with anatomical boundaries defined by ROIs from the Automated Anatomical Labeling (AAL) atlas. Binarization was done by means of maximum probability voxel assignment.

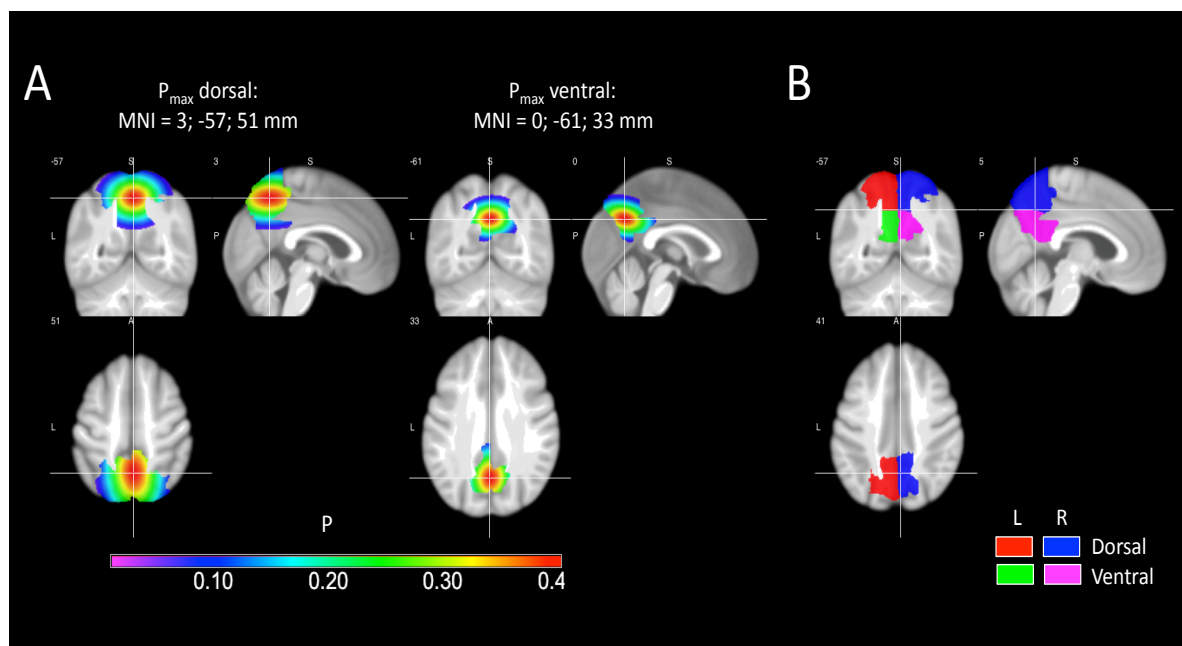

**Figure S3:** The estimated relationship between the temporal positions of the background pictures during familiarization and performance on Day 1. Plots depict the average rates of correct (A) and incorrect (B) responses as a function of position (sliding window  $\pm 5$  background pictures) across all subjects. Error bars show standard errors of the mean.

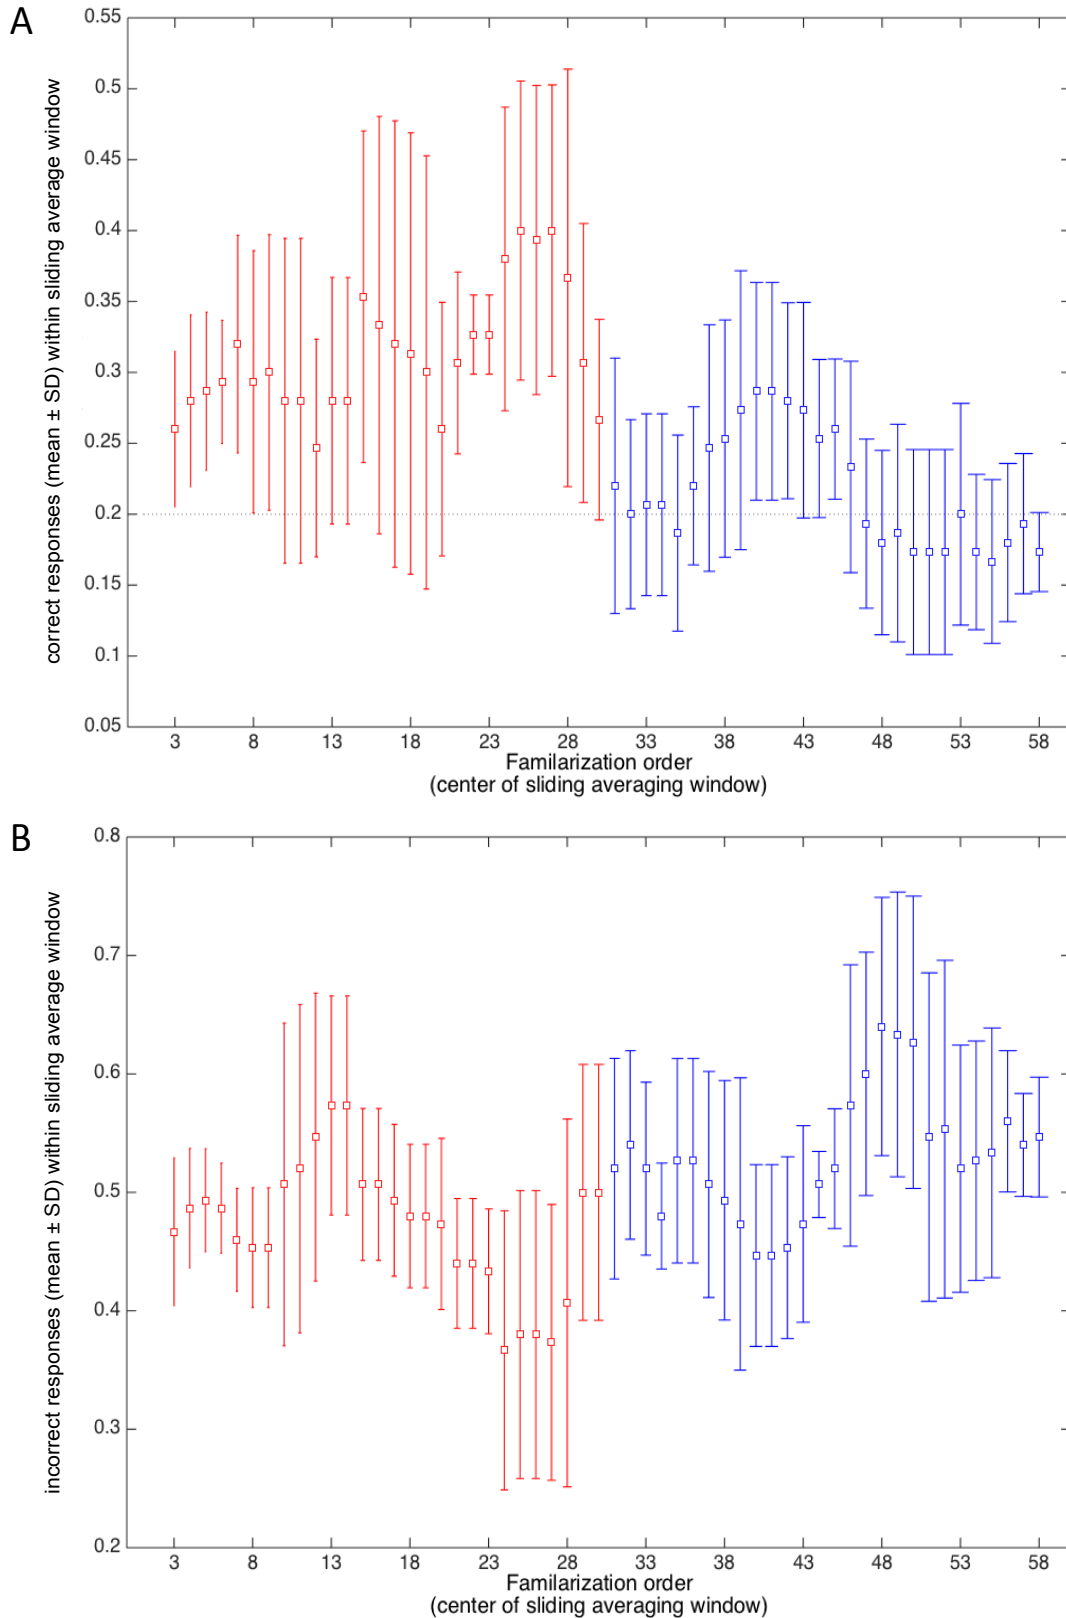



**Figure S4:** SPM contrast testing the BOLD responses to (subsequently) constant versus (subsequently) shuffled configurations on Day 1. For illustrative purposes, contrasts of parameter estimates are shown at  $p < .005$ , uncorrected, with a minimum cluster size of 10 adjacent voxels. At  $p < .001$ , uncorrected, no significant activation differences were observed with the same minimum cluster size.

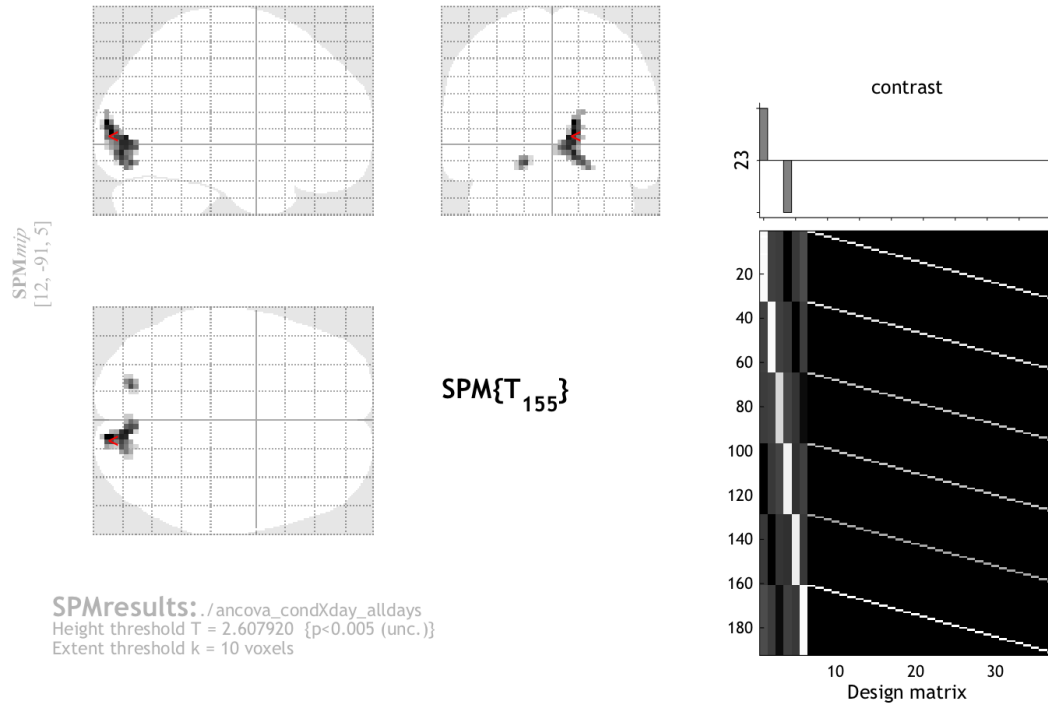

## Supplementary Tables

**Table S1:** Results of repeated measures 3 x 3 ANOVA for the six rigid-body motion parameter estimates and translation-associated Euclidean distances of head displacement.

|         | ME sess                                                 | ME run                                                     | Interaction                                              |
|---------|---------------------------------------------------------|------------------------------------------------------------|----------------------------------------------------------|
| transX  | $F(1.6,49.8) = 0.65$ ( $p = .495$ );<br>$\eta^2 = .020$ | $F(1.7,53.0) = 0.57$ ( $p = .541$ );<br>$\eta^2 = .018$    | $F(3.3,102.7) = 0.09$ ( $p = .972$ );<br>$h^2 = .003$    |
| transY  | $F(1.7,52.2) = 0.31$ ( $p = .700$ );<br>$\eta^2 = .010$ | $F(1.2,37.5) = 5.64$ ( $p = .018$ );<br>$\eta^2 = .154$    | $F(2.7,82.4) = 0.37$ ( $p = .750$ );<br>$\eta^2 = .012$  |
| transZ  | $F(1.8,56.6) = 1.59$ ( $p = .215$ );<br>$\eta^2 = .049$ | $F(1.6,49.8) = 0.55$ ( $p = .542$ );<br>$\eta^2 = .017$    | $F(3.2,100.2) = 0.75$ ( $p = .534$ );<br>$\eta^2 = .024$ |
| transED | $F(1.9,59.0) = 1.37$ ( $p = .261$ );<br>$\eta^2 = .042$ | $F(1.5,47.6) = 3.35$ ( $p = .056$ );<br>$\eta^2 = .097$    | $F(2.6,81.7) = 1.09$ ( $p = .354$ );<br>$\eta^2 = .034$  |
| Pitch   | $F(1.6,50.2) = 2.06$ ( $p = .146$ );<br>$\eta^2 = .062$ | $F(1.7,53.0) = 10.60$ ( $p < .001^*$ );<br>$\eta^2 = .255$ | $F(3.0,91.9) = 2.38$ ( $p = .076$ );<br>$\eta^2 = .071$  |
| Roll    | $F(1.9,60.2) = 0.35$ ( $p = .699$ );<br>$\eta^2 = .011$ | $F(1.5,48.0) = 0.51$ ( $p = .558$ );<br>$\eta^2 = .016$    | $F(3.0,94.5) = 0.215$ ( $p = .889$ );<br>$\eta^2 = .007$ |
| Yaw     | $F(1.9,58.3) = 1.14$ ( $p = .326$ );<br>$\eta^2 = .035$ | $F(1.7,51.2) = 1.20$ ( $p = .304$ );<br>$\eta^2 = .037$    | $F(3.4,105.0) = 1.42$ ( $p = .237$ );<br>$\eta^2 = .044$ |

Reported are F-values and effect sizes. The only Bonferroni-corrected significant finding is shaded in gray. For a graphical depiction see Supplementary Figure 4. *Abbreviations:* ME – main effect; sess – experimental session or Day 1, 3 and 5 respectively; transX, transY, transZ – translation parallel to the x, y and z-axis respectively, transED – translation associated Euclidean distances; \* - significant at  $p < .05$  (Bonferroni corrected for multiple comparisons). Degrees of freedom are Greenhouse-Geisser corrected for sphericity violation.

**Table S2:** Coordinates employed for generation of the probabilistic mPFC ROI.

| <b>Author, year</b>       | <b>Contrast</b>                            | <b>[x y z]</b> | <b>Ref. space</b> |
|---------------------------|--------------------------------------------|----------------|-------------------|
| Sommer, 2017              | related > control paired associates        | -6 48 -10      | mni               |
|                           | retrieval of related paired associates     | 0 56 -8        | mni               |
| van Buuren et al., 2014   | memory representation > no representation  | 0 14 10        | mni               |
|                           |                                            | 4 38 4         | mni               |
|                           |                                            | 4 56 4         | mni               |
|                           | interaction representation X set           | 0 14 42        | mni               |
|                           |                                            | 4 38 4         | mni               |
|                           |                                            | 4 63 14        | mni               |
| van Kesteren et al., 2013 | congruent > incongruent representation     | -2 40 2        | mni               |
|                           | interaction congruency X memory            | 2 46 0         | mni               |
| van Kesteren et al., 2014 | interaction congruency X memory            | 2 46 0         | mni               |
| van Kesteren et al., 2010 | representation-related synchronization     | -4 24 -21      | mni               |
| Schlichting et al., 2015  | separation (main effect)                   | 1 58 -20       | mni               |
|                           | integration (main effect)                  | -8 44 -17      | mni               |
|                           | interaction intgration X learning          | 3 15 -17       | mni               |
|                           |                                            | -7 18 -24      | mni               |
| Kizilirmak et al., 2016   | insight > control                          | -14 43 26      | mni               |
| Brod et al., 2015         | schema-congruent successful retrieval      | -10 44 -6      | mni               |
|                           | interaction congruency X retrieval success | -4 32 -16      | mni               |
| Mack et al., 2016         | learning-related hippocampal connectivity  | 10 43 -6       | mni               |

Coordinates are shown as in the respective original references in either Montreal Neurological Institute (mni) or Talairach (tal) reference space.

**Table S3:** Coordinates employed for generation of the probabilistic ventral precuneus ROI.

| Reference                 | contrast                                | x    | y   | z  | MNI/Tal | overlap |
|---------------------------|-----------------------------------------|------|-----|----|---------|---------|
| Addis et al., 2012        | autobiographic retrieval > imagery      | 4    | -60 | 12 | mni     |         |
|                           | generative > direct retrieval           | -12  | -72 | 20 | mni     |         |
| Basso et al., 2013        | picture naming high > low frequency     | -25  | -61 | 39 | tal     |         |
|                           | picture naming trained > untrained      | -4,4 | -71 | 31 | tal     |         |
| Blondin & Lepage, 2008    | recognition high > low discriminability | -12  | -60 | 16 | mni     |         |
| Bradley et al., 2015      | repetition enhancement                  | -14  | -63 | 26 | tal     |         |
| Brodts et al., 2016       | intecation condition X day              | 15   | -63 | 33 | mni     |         |
|                           |                                         | -12  | -67 | 30 | mni     |         |
| Burianova et al., 2012    | overlapp bottom-up & top-down AtoM      | 20   | -68 | 36 | mni     | +       |
|                           |                                         | 24   | -68 | 52 | mni     | +       |
|                           |                                         | -12  | -76 | 40 | mni     | +       |
| Chow et al., 2018         | memory self vs. other                   | -3   | -60 | 27 | mni     |         |
|                           |                                         | 39   | -54 | 45 | mni     |         |
| Compere et al., 2016      | autobiographic memory > control         | -6   | -54 | 30 | mni     |         |
| Daselaar et al., 2009     | encoding-retrieval flip (faces)         | -12  | -43 | 34 | tal     |         |
|                           | encoding-retrieval flip (scenes)        | 11   | -49 | 28 | tal     |         |
|                           | encoding-retrieval flip (word pairs)    | 4    | -50 | 30 | tal     |         |
|                           | encoding-retrieval flip (words, Exp. 4) | 8    | -42 | 37 | tal     |         |
|                           | encoding-retrieval flip (words, Exp. 5) | -8   | -42 | 33 | tal     |         |
| Daselaar et al., 2008     | memory access > elaboration             | 4    | -54 | 20 | tal     |         |
| de Zubicaray et al., 2005 | retrieval hits > correct rejections     | -33  | -60 | 45 | mni     |         |
| Dhindsa et al., 2014      | judgment of relative direction          | 29   | -56 | 21 | tal     |         |
|                           |                                         | 2    | -53 | 24 | tal     |         |
| Donaldson et al., 2001    | recognition old > new                   | 10   | -66 | 30 | tal     |         |
|                           |                                         | -7   | -69 | 30 | tal     |         |
|                           |                                         | -4   | -45 | 30 | tal     |         |
|                           |                                         | 37   | -69 | 36 | tal     |         |
| Dörfel et al., 2009       | remember vs. miss                       | -3   | -60 | 30 | mni     |         |
|                           | know vs. miss                           | -6   | -60 | 27 | mni     |         |
| Duarte et al., 2011       | source > no source (retrieval)          | 12   | -45 | 15 | mni     |         |
|                           |                                         | -6   | -51 | 27 | mni     |         |
| Elman et al., 2013a       | personally familiar > studied           | -6   | -62 | 12 | mni     |         |
|                           |                                         | -12  | -60 | 14 | mni     |         |
|                           |                                         | 14   | -58 | 16 | mni     |         |
| Elman et al., 2013b       | negative subsequent memory effect       | 10   | -68 | 32 | mni     |         |
| Elman & Shimamura, 2011   | high confidence recognition > new       | -6   | -66 | 24 | mni     |         |
|                           |                                         | -10  | -58 | 20 | mni     |         |
| Frithsen & Miller, 2014   | remember > know                         | -9   | -43 | 34 | mni     |         |
|                           | source > no source (retrieval)          | -6   | -58 | 28 | mni     |         |
| Gardini et al., 2006      | retrieval (autobiographic > specific)   | -8   | -63 | 20 | tal     |         |
|                           |                                         | 8    | -54 | 12 | tal     |         |
|                           |                                         | -10  | -54 | 12 | tal     |         |
| Gomes et al., 2016        | intact > recombined (recognition)       | 12   | -50 | 24 | mni     |         |
|                           | conjunction priming & recognition       | -26  | -72 | 28 | mni     |         |
|                           |                                         | 32   | -68 | 32 | mni     |         |
| Gomez et al., 2013        | egocentric > allocentric recognition    | -6   | -63 | 19 | tal     |         |
|                           | recognition hits > correct rejections   | -6   | -68 | 39 | tal     |         |
| Gvozdanovic et al., 2017  | experimental trauma, explicit retrieval | 14   | -72 | 34 | mni     |         |
|                           |                                         | 24   | -64 | 16 | mni     |         |
|                           |                                         | -6   | -72 | 32 | mni     |         |
|                           |                                         | -14  | -64 | 22 | mni     |         |
|                           |                                         | -14  | -72 | 38 | mni     |         |
| Habeck et al., 2005       | DMS, stimulus phase, deactivations      | -10  | -49 | 30 | tal     |         |
|                           | DMS, maintenance phase, deactivations   | 10   | -63 | 31 | tal     |         |
|                           |                                         | -8   | -59 | 29 | tal     |         |
|                           | DMS, probe phase, deactivations         | -6   | -52 | 45 | tal     |         |
| Habib & Nyberg, 2008      | recall + recognition > forgotten        | -2   | -74 | 40 | tal     |         |
| Herron et al., 2003       | main effect old > new                   | -12  | -66 | 39 | mni     |         |
|                           |                                         | -33  | -72 | 30 | mni     |         |
|                           |                                         | 9    | -63 | 33 | mni     |         |
|                           |                                         | 36   | -66 | 36 | mni     |         |
|                           |                                         | 9    | -39 | 18 | mni     |         |
| Hirose et al., 2013       | retrieval no recency > recency          | -18  | -64 | 30 | mni     |         |
|                           |                                         | -28  | -76 | 40 | mni     |         |
|                           |                                         | -32  | -76 | 28 | mni     |         |
|                           |                                         | -12  | -64 | 18 | mni     |         |
| Hirshhorn et al., 2012    | retrieval > baseline                    | -4   | -58 | 14 | tal     |         |
|                           |                                         | 38   | -74 | 36 | tal     |         |

|                          |                                              |       |       |      |     |   |
|--------------------------|----------------------------------------------|-------|-------|------|-----|---|
| Hornberger et al., 2006  | hits > correct rejections, across conditions | -38   | -78   | 32   | tal |   |
| Hutchinson et al., 2015  | memory strength                              | 6     | -75   | 42   | mni | + |
| Hutchinson et al., 2014  | any source > item only                       | -12   | -66   | 36   | mni |   |
|                          |                                              | -3    | -57   | 27   | mni |   |
|                          |                                              | -3    | -69   | 36   | mni |   |
|                          |                                              | -3    | -39   | 6    | mni |   |
|                          |                                              | -15   | -69   | 27   | mni |   |
| Iidaka et al., 2006      | hits > repetitions                           | -4    | -42   | 10   | mni |   |
| Jessen et al., 2001      | first repetition > novel                     | -6    | -72   | 27   | tal |   |
|                          | second repetition > novel                    | -6    | -69   | 27   | tal |   |
| Kim & Cabeza 2009        | recognition (high & low confidence)          | 28    | -72   | 46   | tal | + |
|                          |                                              | -34   | -64   | 46   | tal | + |
|                          | high confidence recognition                  | -11   | -50   | 34   | tal |   |
| Klostermann et al., 2008 | high confidence recognition abstract         | -28   | -72   | 40   | tal |   |
|                          |                                              | 22    | -74   | 44   | tal |   |
| Kompus et al., 2010      | incidental > intentional retrieval           | -10   | -72   | 32   | mni |   |
| Kondo et al., 2005       | recall (uninstructed)                        | 12    | -74   | 28   | tal |   |
|                          | recall (method of loci)                      | -4    | -76   | 46   | tal | + |
|                          |                                              | 4     | -74   | 30   | tal | + |
| Kwok & Macaluso, 2015    | scene recognition                            | 3     | -42   | 35   | mni |   |
| Kwok et al., 2012        | retrieval temporal > spatial                 | 14    | -60   | 28   | mni |   |
|                          |                                              | -8    | -70   | 26   | mni |   |
| Liu Q et al., 2014       | negative subsequent memory effect            | 2     | -54   | 34   | mni |   |
|                          |                                              | 10    | -50   | 28   | mni |   |
| Lundström et al., 2005   | correct sources > misses                     | -4    | -40   | 32   | mni |   |
|                          |                                              | -6    | -78   | 42   | mni |   |
| Lundström et al., 2003   | source memory imagined > new                 | -6    | -64   | 30   | mni |   |
|                          |                                              | -6    | -70   | 36   | mni |   |
|                          | source memory viewed > new                   | -10   | -68   | 26   | mni |   |
| Maillet & Rajah, 2016    | pleasantness rating > semantic encoding      | -4    | -50   | 26   | mni |   |
| Manelis et al., 2016     | old > partially new > new                    | 12    | -64   | 24   | mni |   |
|                          | old > partially new & old > new              | 12    | -50   | 32   | mni |   |
| McDermott et al., 2017   | hits > corr. rej.; false alarms > corr. rej. | -4    | -67   | 30   | tal |   |
|                          |                                              | -4    | -47   | 27   | tal |   |
|                          |                                              | 9     | -55   | 31   | tal |   |
| Morcom & Rugg, 2012      | old > new (targets)                          | 10    | -72   | 44   | mni | + |
| Nadel et al., 2007       | autobiographic memory > rest                 | -6    | 53    | 31   | tal |   |
|                          |                                              | 8     | -53   | 29   | tal |   |
| Nelson et al., 2013      | tested > restudied > no practice             | -8    | -73   | 36   | mni | + |
| Otten et al., 2002       | subsequent memory effect (state)             | -3    | -60   | 30   | mni |   |
| Philips et al., 2009     | retrieval preparation                        | -28   | -73   | 24   | tal |   |
|                          |                                              | 29    | -74   | 25   | tal |   |
|                          | retrieval phase                              | -14   | -68   | 25   | tal |   |
|                          |                                              | -15   | -72   | 47   | tal |   |
| Raposo et al., 2016      | semantic > perceptual encoding               | -4    | -54   | 16   | mni |   |
| Reas & Brewer, 2013      | memory strength (high > low)                 | 34,9  | -70,6 | 23,1 | tal |   |
| Rekkas & Constable, 2005 | recent memory retrieval                      | -7    | -48   | 30   | tal |   |
|                          |                                              | 7     | -48   | 30   | tal |   |
|                          | remote memory retrieval                      | -9    | -48   | 20   | tal |   |
|                          |                                              | 9     | -48   | 20   | tal |   |
| Rosen et al., 2018       | retrieval > stimulus-guided attention        | -4,8  | -80,4 | 23,8 | mni |   |
|                          |                                              | 6,9   | -78,8 | 20,1 | mni |   |
|                          | memory-guided > stimulus-guided attention    | -13,6 | -67,4 | 39,6 | mni | + |
|                          |                                              | 6,9   | -65,2 | 40,9 | mni | + |
| Schott et al., 2005      | retrieval > priming                          | -9    | -60   | 31   | tal |   |
|                          |                                              | -6    | -54   | 33   | tal |   |
| Schott et al., 2013      | hippocampal connectivity (deep study)        | 3     | -57   | 45   | tal | + |
|                          |                                              | 6     | -45   | 50   | tal | + |
|                          | hippocampal connectivity (shallow study)     | 0     | -72   | 35   | tal | + |
|                          |                                              | 6     | -65   | 51   | tal | + |
| Sestieri et al., 2011    | memory search > baseline                     | -2    | 64    | 24   | tal |   |
| Sheldon & Levine, 2018   | hippocampal conn. (autobiograph. retrieval)  | 8     | -52   | 16   | mni |   |
|                          |                                              | 4     | -56   | 34   | mni |   |
| Smith & Squire, 2009     | age of memory                                | 26,2  | -83,7 | 36,1 | tal |   |
| Sommer et al., 2006      | primacy effect                               | 18    | -75   | 30   | mni |   |
|                          |                                              | -12   | -84   | 30   | mni |   |
|                          | subsequent memory effect                     | 12    | -75   | 21   | mni |   |
|                          |                                              | -3    | -78   | 24   | mni |   |
| St Jacques et al., 2018  | episodic counterfactual simulation           | -4    | -68   | 38   | mni |   |
| Sagiura et al., 2009     | face recognition (personally familiar)       | -10   | -62   | 42   | mni | + |
|                          | face recognition (famous)                    | -4    | -56   | 44   | mni | + |

|                             |                                              |     |     |    |     |   |
|-----------------------------|----------------------------------------------|-----|-----|----|-----|---|
|                             | face recognition (unfamiliar)                | -2  | -56 | 38 | mni | + |
| Saguira et al., 2005        | familiar > unfamiliar                        | -4  | -72 | 36 | tal |   |
| Takahashi et al., 2009      | hits > correct rejections                    | 24  | -62 | 22 | tal |   |
| Takashima et al., 2007      | stable > labile memory                       | -4  | -54 | 36 | mni |   |
|                             |                                              | 2   | -50 | 34 | mni |   |
| Trinkler et al., 2009       | main effect of recollection                  | -6  | -87 | 12 | mni |   |
|                             |                                              | -30 | -84 | 30 | mni |   |
| Uncapher et al., 2006       | subsequent memory effect (features)          | 24  | -72 | 27 | mni |   |
| van der Linden et al., 2017 | parametric schema effect                     | 15  | -46 | 40 | tal | + |
| van Mulukom et al., 2013    | repeated future imagery                      | 14  | -66 | 36 | mni |   |
| Vilberg and Rugg, 2009      | hits > correct rejections                    | 18  | -57 | 18 | mni |   |
| von Zerssen et al., 2001    | hits > correct rejections                    | -5  | -69 | 35 | tal |   |
|                             | old & related > new                          | -8  | -69 | 30 | tal |   |
|                             | related > new                                | -8  | -64 | 36 | tal |   |
|                             |                                              | 1   | -67 | 31 | tal |   |
|                             | related false alarms > new                   | -8  | -68 | 40 | tal |   |
|                             |                                              | 1   | -70 | 32 | tal |   |
| Weymar et al., 2018         | repetition enhancement                       | -6  | -70 | 25 | mni |   |
|                             |                                              | 13  | -68 | 25 | mni |   |
| Wimber et al., 2008         | retrieval practice > no practice             | 2   | -54 | 36 | mni | + |
|                             |                                              | 8   | -62 | 36 | mni | + |
|                             |                                              | -10 | -56 | 36 | mni | + |
|                             |                                              | -10 | -64 | 48 | mni | + |
|                             |                                              | 10  | -74 | 32 | mni | + |
|                             |                                              | 16  | -66 | 56 | mni | + |
|                             |                                              | 10  | -70 | 52 | mni | + |
| Wimber et al., 2010         | subsequent priming effect                    | -12 | -60 | 21 | mni |   |
|                             |                                              | 12  | -57 | 24 | mni |   |
|                             |                                              | 9   | -54 | 33 | mni |   |
|                             | subsequent memory effect                     | -15 | -81 | 42 | mni |   |
| Yamawaki et al., 2017       | self-referential face encoding (hipp. conn.) | -2  | -74 | 37 | mni |   |
|                             |                                              | 17  | -51 | 37 | mni |   |
| Yonelinas et al., 2005      | increase with familiarity                    | 9   | -72 | 36 | mni |   |
| Zeithamova et al., 2008     | prototype learning                           | -20 | -60 | 36 | mni | + |
|                             |                                              | 22  | -64 | 48 | mni | + |

Coordinates are shown as in the respective original references in either Montreal Neurological Institute (mni) or Talairach (tal) reference space. "Overlap" denotes coordinates used in both ROIs.

**Table S4:** Coordinates employed for generation of the probabilistic dorsal precuneus ROI.

| Reference                 | contrast                                    | x     | y   | z    | MNI/Tal | overlap |
|---------------------------|---------------------------------------------|-------|-----|------|---------|---------|
| Addis et al., 2012        | imagery > autobiographic retrieval          | 12    | -64 | 48   | mni     |         |
|                           | direct > generative retrieval               | -4    | -56 | 40   | mni     |         |
|                           |                                             | 36    | -52 | 40   | mni     |         |
| Aso et al., 2007          | object orientation (rotation) > baseline    | -32   | -60 | 49   | tal     |         |
|                           | object orientation (translation) > baseline | 26    | -67 | 49   | tal     |         |
| Blondin & Lepage, 2008    | recognition low > high discriminability     | -16   | -54 | 54   | mni     |         |
|                           |                                             | -12   | -70 | 62   | mni     |         |
|                           |                                             | 34    | -42 | 38   | mni     |         |
| Bradley et al., 2015      | processing of novel scenes                  | -26   | -62 | 45   | tal     |         |
|                           |                                             | 26    | -63 | 47   | tal     |         |
| Brod et al., 2015         | successful > unsuccessful retrieval         | 18    | -42 | 70   | mni     |         |
|                           | schema-incongruent successful retrieval     | -6    | -76 | 52   | mni     |         |
|                           |                                             | -4    | -36 | 48   | mni     |         |
| Brodt et al., 2016        | decision > no decision                      | 15    | -73 | 52   | mni     |         |
|                           |                                             | 9     | -63 | 60   | mni     |         |
|                           |                                             | -9    | -85 | 46   | mni     |         |
| Burianova et al., 2012    | overlapp bottom-up & top-down AtoM          | 20    | -68 | 36   | mni     | +       |
|                           |                                             | 24    | -68 | 52   | mni     | +       |
|                           |                                             | -12   | -76 | 40   | mni     | +       |
| Cabeza et al., 2011       | orienting-related activity                  | -26   | -67 | 45   | tal     |         |
|                           |                                             | 30    | -52 | 45   | tal     |         |
|                           |                                             | 11    | -71 | 39   | tal     |         |
| Chow et al., 2018         | previewed vs. not previewed                 | -33   | -75 | 39   | mni     |         |
| Daselaar et al., 2008     | memory elaboration > access                 | -26   | -52 | 58   | tal     |         |
| de Zubicaray et al., 2005 | retrieval correct rejections > hits         | 6     | -63 | 60   | mni     |         |
|                           |                                             | 21    | -63 | 21   | mni     |         |
| Dhindsa et al., 2014      | pointing from imagery                       | 23    | -56 | 48   | tal     |         |
|                           |                                             | 8     | -44 | 45   | tal     |         |
|                           |                                             | -28   | -47 | 51   | tal     |         |
| Duarte et al., 2011       | no source > source (encoding)               | -9    | -69 | 42   | mni     |         |
|                           |                                             | 15    | -66 | 39   | mni     |         |
| Elman et al., 2013a       | studied > personally familiar               | -36   | -52 | 52   | mni     |         |
|                           |                                             | -32   | -58 | 56   | mni     |         |
|                           |                                             | 38    | -44 | 54   | mni     |         |
|                           |                                             | 34    | -52 | 54   | mni     |         |
| Elman et al., 2013b       | positive subsequent memory effect           | -21,9 | -59 | 51,8 | mni     |         |
|                           |                                             | 23,8  | -61 | 50,6 | mni     |         |
| Frings et al., 2006       | encoding vs. viewing                        | 36    | -72 | 33   | mni     |         |
|                           |                                             | -24   | -53 | 57   | mni     |         |
|                           | recognition vs. viewing                     | -15   | -66 | 30   | mni     |         |
|                           |                                             | 0     | -63 | 57   | mni     |         |
|                           | (encoding + recognition) > viewing          | 3     | -63 | 57   | mni     |         |
|                           | encoding > control (encoding)               | -24   | -69 | 57   | mni     |         |
|                           |                                             | 15    | -66 | 54   | mni     |         |
|                           | recognition > control (recognition)         | 18    | -75 | 45   | mni     |         |
|                           |                                             | -9    | -75 | 48   | mni     |         |
|                           | (encoding + recognition) > control          | -24   | -69 | 57   | mni     |         |
|                           | 15                                          | -66   | 54  | mni  |         |         |
| Frithsen & Miller, 2014   | know > new                                  | -9    | -70 | 43   | mni     |         |
|                           | no source hits > correct rejections         | 36    | -73 | 40   | mni     |         |
| Gardini et al., 2006      | retrieval (specific > autobiographic)       | -30   | -67 | 49   | mni     |         |
|                           |                                             | 24    | -78 | 30   | tal     |         |
|                           |                                             | 16    | -74 | 39   | tal     |         |
|                           |                                             | 26    | -59 | 64   | tal     |         |
|                           |                                             | 34    | 62  | 45   | tal     |         |
| Gomes et al., 2016        | recombined > new (priming)                  | 34    | -54 | 49   | tal     |         |
|                           |                                             | 2     | -64 | 36   | mni     |         |
|                           | recombined > new (recognition)              | -32   | -46 | 38   | mni     |         |
|                           |                                             | 36    | -62 | 46   | mni     |         |
| Gomez et al., 2013        | egocentric-updated specific processing      | -36   | -77 | 43   | mni     |         |
| Habeck et al., 2005       | DMS, stimulus phase, activations            | -2    | -72 | 46   | tal     |         |
| Hales & Brewer, 2011      | associative > item only                     | 14    | -45 | 72   | tal     |         |
| Hales & Brewer, 2013      | location > no location                      | 26    | -65 | 24   | tal     |         |
|                           |                                             | -14   | -57 | 48   | tal     |         |
| Handy et al., 2004        | imagery pictures > nouns                    | 15    | -72 | 36   | tal     |         |
|                           |                                             | 36    | -57 | 45   | tal     |         |
| Herron et al., 2003       | encoding pictures > baseline                | -30   | -63 | 51   | tal     |         |
|                           | interaction old-new X probability           | -39   | -30 | 54   | mni     |         |

|                          |                                              |       |     |      |     |   |
|--------------------------|----------------------------------------------|-------|-----|------|-----|---|
| Hirose et al., 2013      | retrieval recency > no recency               | -33   | 57  | 60   | mni |   |
| Hirshhorn et al., 2012   | difficult allocentric retrieval              | 6     | -48 | 42   | mni |   |
|                          |                                              | 22    | -62 | 20   | tal |   |
|                          |                                              | 10    | -78 | 52   | tal |   |
| Hornberger et al., 2006  | hits > correct rejections, across conditions | 6     | -75 | 42   | mni | + |
| Hutchinson et al., 2015  | decision uncertainty                         | 15    | -69 | 57   | mni |   |
|                          |                                              | -9    | -72 | 57   | mni |   |
|                          | decision uncertainty (PPI)                   | -12   | -66 | 60   | mni |   |
| Hutchinson et al., 2014  | item only > correct rejections               | -12   | -66 | 45   | mni |   |
|                          |                                              | -12   | -63 | 60   | mni |   |
|                          | task source > specific source                | -15   | -66 | 54   | mni |   |
|                          |                                              | 18    | -66 | 51   | mni |   |
| Iidaka et al., 2006      | hits > correct rejections                    | 6     | -74 | 46   | mni |   |
| Jessen et al., 2001      | second > first repetition                    | 6     | -57 | 42   | tal |   |
| Jordan et al., 2004      | navigation > control                         | 12    | -76 | 56   | mni |   |
| Kim & Cabeza 2009        | recognition (high & low confidence)          | 28    | -72 | 46   | tal | + |
|                          |                                              | -34   | -64 | 46   | tal | + |
|                          | low confidence recognition                   | 11    | -61 | 52   | tal |   |
| Klostermann et al., 2008 | high confidence recognition concrete         | 24    | -78 | 48   | tal |   |
|                          |                                              | -8    | -62 | 26   | tal |   |
| Klostermann et al., 2009 | positive subsequent memory effect            | -14   | -72 | 62   | mni |   |
|                          |                                              | 24    | -44 | 76   | mni |   |
|                          | hits > correct rejections                    | -10   | -60 | 60   | mni |   |
|                          |                                              | -12   | -66 | -70  | mni |   |
|                          |                                              | 12    | -50 | 56   | mni |   |
| Kompus et al., 2010      | intentional > incidental retrieval           | 24    | -50 | 56   | mni |   |
|                          |                                              | -12   | -62 | 70   | mni |   |
| Kondo et al., 2005       | encoding (method of loci)                    | -6    | -80 | 48   | tal |   |
|                          | recall (method of loci)                      | -4    | -76 | 46   | tal | + |
|                          |                                              | 4     | -74 | 30   | tal | + |
| Kwok & Macaluso, 2015    | scene chronology                             | 6     | -54 | 47   | mni |   |
|                          | scene layout                                 | -21   | -66 | 59   | mni |   |
|                          |                                              | 21    | -63 | 59   | mni |   |
| Kwok et al., 2012        | retrieval spatial > temporal                 | -18   | -72 | 54   | mni |   |
|                          |                                              | 24    | -70 | 56   | mni |   |
| Lambrey et al., 2012     | spatial perspective taking (encoding)        | 12    | -66 | 54   | mni |   |
|                          |                                              | -3    | -54 | 54   | mni |   |
|                          |                                              | -12   | -60 | 54   | mni |   |
|                          | spatial perspective taking (delay)           | 27    | -72 | 54   | mni |   |
| Lundström et al., 2005   | correct sources > false alarms               | 12    | -74 | 54   | mni |   |
|                          |                                              | 22    | -74 | 52   | mni |   |
|                          |                                              | -6    | 70  | 60   | mni |   |
| Lundström et al., 2003   | source > item memory imagined                | -12   | -64 | 46   | mni |   |
|                          | source memory imagined > viewed              | -18   | -66 | 40   | mni |   |
|                          | item memory viewed > new                     | -2    | -64 | 42   | mni |   |
| Maillet & Rajah, 2016    | item > source memory                         | 6     | -78 | 50   | mni |   |
|                          |                                              | -4    | 76  | 52   | mni |   |
|                          |                                              | 4     | -66 | 60   | mni |   |
| Minamoto et al., 2012    | distracters forgotten > remembered           | 2     | -48 | 41   | tal |   |
|                          |                                              | 0     | 72  | 42   | tal |   |
|                          |                                              | 8     | -47 | 63   | tal |   |
| Morcom & Rugg, 2012      | old > new (targets)                          | 10    | -72 | 44   | mni | + |
| Nadel et al., 2007       | multiple > recent retrieval                  | 9     | -67 | 48   | tal |   |
|                          |                                              | -15   | -47 | 52   | tal |   |
|                          |                                              | 15    | -65 | 51   | tal |   |
|                          |                                              | -25   | 53  | 39   | tal |   |
| Nelson et al., 2013      | tested > restudied > no practice             | -8    | -73 | 36   | mni | + |
| Otten et al., 2002       | negative subsequent memory effect (state)    | 0     | -54 | 60   | mni |   |
| Pollmann et al., 2003    | visual marking of distractors                | 7     | -65 | 50   | tal |   |
|                          |                                              | -7    | -62 | 52   | tal |   |
|                          |                                              | -3    | -57 | 48   | mni |   |
| Richter et al., 2016     | memory vividness                             | -3    | -57 | 48   | mni |   |
| Rosen et al., 2018       | memory-guided > stimulus-guided attention    | -13,6 | -67 | 39,6 | mni | + |
|                          |                                              | 6,9   | -65 | 40,9 | mni | + |
|                          | stimulus-guided attention > retrieval        | 15,9  | -58 | 57,4 | mni |   |
| Schinazi & Epstein, 2010 | navigation; decision > no decision           | 3     | -61 | 59   | mni |   |
|                          |                                              | 17    | -61 | 63   | mni |   |
|                          |                                              | -16   | -60 | 63   | mni |   |
| Schott et al., 2013      | hippocampal connectivity (deep study)        | 3     | -57 | 45   | tal | + |
|                          |                                              | 6     | -45 | 50   | tal | + |
|                          | hippocampal connectivity (shallow study)     | 0     | -72 | 35   | tal | + |
|                          |                                              | 6     | -65 | 51   | tal | + |

|                             |                                            |       |     |      |     |   |
|-----------------------------|--------------------------------------------|-------|-----|------|-----|---|
| Sheldon & Levine, 2018      | hippocampal conn. (spatial retrieval)      | 8     | -70 | 54   | mni |   |
|                             |                                            | 0     | -34 | 70   | mni |   |
| Shelton & Gabrieli, 2002    | spatial encoding (routes)                  | 6     | -45 | 54   | mni |   |
|                             |                                            | -18   | -63 | 60   | mni |   |
|                             |                                            | 15    | -63 | 57   | mni |   |
|                             | spatial encoding (survey)                  | -18   | -66 | 60   | mni |   |
|                             |                                            | 15    | -63 | 57   | mni |   |
| Smith & Squire, 2009        | encoding of test questions                 | -3,7  | -52 | 67,4 | tal |   |
| Sommer et al., 2005         | subsequent memory effect (spatial)         | 27    | -60 | 54   | mni |   |
|                             |                                            | -15   | -78 | 54   | mni |   |
| St Jacques et al., 2017     | perspective shift during retrieval         | 0     | -60 | 44   | mni |   |
| Stock et al., 2009          | visual encoding locations > objects        | 6     | -58 | 44   | tal |   |
|                             |                                            | -5    | -59 | 45   | tal |   |
| Sagiura et al., 2009        | face recognition (personally familiar)     | -10   | -62 | 42   | mni | + |
|                             | face recognition (famous)                  | -4    | -56 | 44   | mni | + |
|                             | face recognition (unfamiliar)              | -2    | -56 | 38   | mni | + |
| Saguira et al., 2005        | places > objects                           | 2     | -46 | 42   | tal |   |
| Takashima et al., 2007      | stable & labile > no memory                | 16    | -66 | 54   | mni |   |
|                             |                                            | 12    | -68 | 67   | mni |   |
| Uncapher & Rugg, 2005       | encoding / divided attention (hard > easy) | 24    | -60 | 57   | mni |   |
| Uncapher & Rugg, 2009       | feature-specific encoding of location      | 9     | -54 | 69   | mni |   |
|                             |                                            | -12   | 45  | 60   | mni |   |
| van Assche et al., 2016     | familiar > unfamiliar places               | 0     | -67 | 52   | mni |   |
| van der Linden et al., 2017 | parametric schema effect                   | 15    | -46 | 40   | tal | + |
| Wimber et al., 2008         | retrieval practice > no practice           | 2     | -54 | 36   | mni | + |
|                             |                                            | 8     | -62 | 36   | mni | + |
|                             |                                            | -10   | -56 | 36   | mni | + |
|                             |                                            | -10   | -64 | 48   | mni | + |
|                             |                                            | 10    | -74 | 32   | mni | + |
|                             |                                            | 16    | -66 | 56   | mni | + |
|                             |                                            | 10    | -70 | 52   | mni | + |
| Yang et al., 2017           | object location (source of N1 ERP effect)  | -22   | -66 | 45   | mni |   |
| Yu & Shin, 2017             | visual working memory maintenance          | -24,6 | -62 | 47,3 | tal |   |
|                             |                                            | 18,5  | -63 | 51,4 | tal |   |
| Zeithamova et al., 2008     | prototype learning                         | -20   | -60 | 36   | mni | + |
|                             |                                            | 22    | -64 | 48   | mni | + |

Coordinates are shown as in the respective original references in either Montreal Neurological Institute (mni) or Talairach (tal) reference space. "Overlap" denotes coordinates used in both ROIs.



**Table S5:** Response rates, separated by condition and day.

|                      | <b>Constant</b> |           | <b>Shuffled</b> |           |
|----------------------|-----------------|-----------|-----------------|-----------|
|                      | Mean            | Std. Dev. | Mean            | Std. Dev. |
| Day 1                |                 |           |                 |           |
| correct              | <b>.288</b>     | .1223     | <b>.201</b>     | .0819     |
| incorrect            | <b>.440</b>     | .1506     | <b>.499</b>     | .1807     |
| omissions            | <b>.273</b>     | .1970     | <b>.300</b>     | .2159     |
| adjusted recognition | <b>.398</b>     | .1501     | <b>.294</b>     | .1463     |
| Day 2                |                 |           |                 |           |
| correct              | <b>.431</b>     | .1347     | <b>.252</b>     | .1033     |
| incorrect            | <b>.388</b>     | .1311     | <b>.538</b>     | .1806     |
| omissions            | <b>.181</b>     | .1635     | <b>.210</b>     | .2128     |
| adjusted recognition | <b>.524</b>     | .1411     | <b>.325</b>     | .1321     |
| Day 3                |                 |           |                 |           |
| correct              | <b>.484</b>     | .1328     | <b>.291</b>     | .0925     |
| incorrect            | <b>.380</b>     | .1712     | <b>.555</b>     | .1652     |
| omissions            | <b>.135</b>     | .1547     | <b>.154</b>     | .1454     |
| adjusted recognition | <b>.570</b>     | .1517     | <b>.354</b>     | .1220     |
| Day 4                |                 |           |                 |           |
| correct              | <b>.514</b>     | .1414     | <b>.318</b>     | .1016     |
| incorrect            | <b>.388</b>     | .1853     | <b>.528</b>     | .1725     |
| omissions            | <b>.099</b>     | .1118     | <b>.154</b>     | .1586     |
| adjusted recognition | <b>.580</b>     | .1795     | <b>.388</b>     | .1494     |
| Day 5                |                 |           |                 |           |
| correct              | <b>.533</b>     | .1597     | <b>.294</b>     | .1216     |
| incorrect            | <b>.365</b>     | .1606     | <b>.553</b>     | .1714     |
| omissions            | <b>.102</b>     | .1253     | <b>.153</b>     | .1531     |
| adjusted recognition | <b>.596</b>     | .1644     | <b>.353</b>     | .1539     |
| Delayed memory       |                 |           |                 |           |
| correct              | <b>.274</b>     | .1300     | <b>.217</b>     | .0924     |
| incorrect            | <b>.521</b>     | .2201     | <b>.554</b>     | .2173     |
| omissions            | <b>.205</b>     | .2206     | <b>.229</b>     | .2414     |
| adjusted recognition | <b>.359</b>     | .1645     | <b>.300</b>     | .1306     |

*Adjusted recognition: recognition rates adjusted for uncertainty as indicated by omitted responses (correct / [1-omissions]). Std. Dev. = standard deviation.*

## References

- Addis, D.R., Knapp, K., Roberts, R.P., Schacter, D.L. (2012) Routes to the past: neural substrates of direct and generative autobiographical memory retrieval. *Neuroimage*, 59:2908-22.
- Anderson, M.C., Bjork, R.A., Bjork, E.L. (1994) Remembering can cause forgetting: Retrieval dynamics in long-term memory. *Journal of Experimental Psychology: Learning, Memory, and Cognition*, 20:1063–1087.
- Aso, T., Hanakawa, T., Matsuo, K., Toma, K., Shibasaki, H., Fukuyama, H., Nakai, T. (2007) Subregions of human parietal cortex selectively encoding object orientation. *Neurosci Lett*, 415:225-30.
- Basso, G., Magon, S., Reggiani, F., Capasso, R., Monittola, G., Yang, F.J., Miceli, G. (2013) Distinguishable neurofunctional effects of task practice and item practice in picture naming: a BOLD fMRI study in healthy subjects. *Brain Lang*, 126:302-13.
- Bäuml, K.H. (1997) The list-strength effect: Strength-dependent competition or suppression? *Psychonomic Bulletin & Review*, 4:260–264.
- Blondin, F., Lepage, M. (2008) An fMRI study on memory discriminability for complex visual scenes. *Hum Brain Mapp*, 29:1159-69.
- Bradley, M.M., Costa, V.D., Ferrari, V., Codispoti, M., Fitzsimmons, J.R., Lang, P.J. (2015) Imaging distributed and massed repetitions of natural scenes: spontaneous retrieval and maintenance. *Hum Brain Mapp*, 36:1381-92.
- Brod, G., Lindenberger, U., Werkle-Bergner, M., Shing, Y.L. (2015) Differences in the neural signature of remembering schema-congruent and schema-incongruent events. *Neuroimage*, 117:358-66.
- Brod, S., Pohlchen, D., Flanagan, V.L., Glasauer, S., Gais, S., Schonauer, M. (2016) Rapid and independent memory formation in the parietal cortex. *Proc Natl Acad Sci U S A*, 113:13251-13256.
- Burianova, H., Ciaramelli, E., Grady, C.L., Moscovitch, M. (2012) Top-down and bottom-up attention-to-memory: mapping functional connectivity in two distinct networks that underlie cued and uncued recognition memory. *Neuroimage*, 63:1343-52.
- Button, K.S., Ioannidis, J.P., Mokrysz, C., Nosek, B.A., Flint, J., Robinson, E.S., Munafò, M.R. (2013) Power failure: why small sample size undermines the reliability of neuroscience. *Nat Rev Neurosci* 14:365-376.
- Cabeza, R., Mazuz, Y.S., Stokes, J., Kragel, J.E., Woldorff, M.G., Ciaramelli, E., Olson, I.R., Moscovitch, M. (2011) Overlapping parietal activity in memory and perception: evidence for the attention to memory model. *J Cogn Neurosci*, 23:3209-17.
- Chow, T.E., Westphal, A.J., Rissman, J. (2018) Multi-voxel pattern classification differentiates personally experienced event memories from secondhand event knowledge. *Neuroimage*, 176:110-123.
- Compere, L., Sperduti, M., Gallarda, T., Anssens, A., Lion, S., Delhommeau, M., Martinelli, P., Devauchelle, A.D., Oppenheim, C., Piolino, P. (2016) Sex Differences in the Neural Correlates of Specific and General Autobiographical Memory. *Front Hum Neurosci*, 10:285.
- Daselaar, S.M., Prince, S.E., Dennis, N.A., Hayes, S.M., Kim, H., Cabeza, R. (2009) Posterior midline and ventral parietal activity is associated with retrieval success and encoding failure. *Front Hum Neurosci*, 3:13.
- Daselaar, S.M., Rice, H.J., Greenberg, D.L., Cabeza, R., LaBar, K.S., Rubin, D.C. (2008) The spatiotemporal dynamics of autobiographical memory: neural correlates of recall, emotional intensity, and reliving. *Cereb Cortex*, 18:217-29.
- de Zubicaray, G.I., McMahon, K.L., Eastburn, M.M., Finnigan, S., Humphreys, M.S. (2005) fMRI evidence of word frequency and strength effects in recognition memory. *Brain Res Cogn Brain Res*, 24:587-98.
- Dhindsa, K., Drobinin, V., King, J., Hall, G.B., Burgess, N., Becker, S. (2014) Examining the role of the temporo-parietal network in memory, imagery, and viewpoint transformations. *Front Hum Neurosci*, 8:709.

- Donaldson, D.I., Petersen, S.E., Buckner, R.L. (2001) Dissociating memory retrieval processes using fMRI: evidence that priming does not support recognition memory. *Neuron*, 31:1047-59.
- Dorfel, D., Werner, A., Schaefer, M., von Kummer, R., Karl, A. (2009) Distinct brain networks in recognition memory share a defined region in the precuneus. *Eur J Neurosci*, 30:1947-59.
- Duarte, A., Henson, R.N., Graham, K.S. (2011) Stimulus content and the neural correlates of source memory. *Brain Res*, 1373:110-23.
- Elman, J.A., Cohn-Sheehy, B.I., Shimamura, A.P. (2013) Dissociable parietal regions facilitate successful retrieval of recently learned and personally familiar information. *Neuropsychologia*, 51:573-83.
- Elman, J.A., Rosner, Z.A., Cohn-Sheehy, B.I., Cerreta, A.G., Shimamura, A.P. (2013) Dynamic changes in parietal activation during encoding: implications for human learning and memory. *Neuroimage*, 82:44-52.
- Elman, J.A., Shimamura, A.P. (2011) Task relevance modulates successful retrieval effects during explicit and implicit memory tests. *Neuroimage*, 56:345-53.
- Fatima, Z., Kovacevic, N., Misic, B., McIntosh, A.R. (2016) Dynamic functional connectivity shapes individual differences in associative learning. *Hum Brain Mapp*, 37:3911-3928.
- Frings, L., Wagner, K., Quiske, A., Schwarzwald, R., Spreer, J., Halsband, U., Schulze-Bonhage, A. (2006) Precuneus is involved in allocentric spatial location encoding and recognition. *Exp Brain Res*, 173:661-72.
- Frithsen, A., Miller, M.B. (2014) The posterior parietal cortex: comparing remember/know and source memory tests of recollection and familiarity. *Neuropsychologia*, 61:31-44.
- Gardini, S., Cornoldi, C., De Beni, R., Venneri, A. (2006) Left mediotemporal structures mediate the retrieval of episodic autobiographical mental images. *Neuroimage*, 30:645-55.
- Gomes, C.A., Figueiredo, P., Mayes, A. (2016) Priming for novel object associations: Neural differences from object item priming and equivalent forms of recognition. *Hippocampus*, 26:472-91.
- Gomez, A., Cerles, M., Rousset, S., Le Bas, J.F., Baciú, M. (2013) Ongoing egocentric spatial processing during learning of non-spatial information results in temporal-parietal activity during retrieval. *Front Psychol*, 4:366.
- Guderian, S., Schott, B.H., Richardson-Klavehn, A., Düzel, E. (2009) Medial temporal theta state before an event predicts episodic encoding success in humans. *Proc Natl Acad Sci U S A*. 106:5365-5370.
- Gvozdanovic, G.A., Stampfli, P., Seifritz, E., Rasch, B. (2017) Neural correlates of experimental trauma memory retrieval. *Hum Brain Mapp*.
- Habeck, C., Rakitin, B.C., Moeller, J., Scarmeas, N., Zarahn, E., Brown, T., Stern, Y. (2005) An event-related fMRI study of the neural networks underlying the encoding, maintenance, and retrieval phase in a delayed-match-to-sample task. *Brain Res Cogn Brain Res*, 23:207-20.
- Habib, R., Nyberg, L. (2008) Neural correlates of availability and accessibility in memory. *Cereb Cortex*, 18:1720-6.
- Hales, J.B., Brewer, J.B. (2011) The timing of associative memory formation: frontal lobe and anterior medial temporal lobe activity at associative binding predicts memory. *J Neurophysiol*, 105:1454-63.
- Hales, J.B., Brewer, J.B. (2013) Parietal and frontal contributions to episodic encoding of location. *Behav Brain Res*, 243:16-20.
- Handy, T., Miller, M., Schott, B., Shroff, N., Janata, P., Van Horn, J., Inati, S., Grafton, S., Gazzaniga, M. (2004) Visual Imagery and memory ,Äi Do retrieval strategies affect what the mind,Äs eye sees? . *European Journal of Cognitive Psychology* 16:631-652.
- Herron, J.E., Henson, R.N., Rugg, M.D. (2004) Probability effects on the neural correlates of retrieval success: an fMRI study. *Neuroimage*, 21:302-10.
- Hirose, S., Kimura, H.M., Jimura, K., Kunitatsu, A., Abe, O., Ohtomo, K., Miyashita, Y., Konishi, S. (2013) Dissociable temporo-parietal memory networks revealed by functional connectivity during episodic retrieval. *PLoS One*, 8:e71210.

- Hirshhorn, M., Grady, C., Rosenbaum, R.S., Winocur, G., Moscovitch, M. (2012) Brain regions involved in the retrieval of spatial and episodic details associated with a familiar environment: an fMRI study. *Neuropsychologia*, 50:3094-106.
- Hornberger, M., Rugg, M.D., Henson, R.N. (2006) fMRI correlates of retrieval orientation. *Neuropsychologia*, 44:1425-36.
- Hutchinson, J.B., Uncapher, M.R., Wagner, A.D. (2015) Increased functional connectivity between dorsal posterior parietal and ventral occipitotemporal cortex during uncertain memory decisions. *Neurobiol Learn Mem*, 117:71-83.
- Hutchinson, J.B., Uncapher, M.R., Weiner, K.S., Bressler, D.W., Silver, M.A., Preston, A.R., Wagner, A.D. (2014) Functional heterogeneity in posterior parietal cortex across attention and episodic memory retrieval. *Cereb Cortex*, 24:49-66.
- Iidaka, T., Matsumoto, A., Nogawa, J., Yamamoto, Y., Sadato, N. (2006) Frontoparietal network involved in successful retrieval from episodic memory. Spatial and temporal analyses using fMRI and ERP. *Cereb Cortex*, 16:1349-60.
- Jessen, F., Flacke, S., Granath, D.O., Manka, C., Scheef, L., Papassotiropoulos, A., Schild, H.H., Heun, R. (2001) Encoding and retrieval related cerebral activation in continuous verbal recognition. *Brain Res Cogn Brain Res*, 12:199-206.
- Jordan, K., Schadow, J., Wuestenberg, T., Heinze, H.J., Jancke, L. (2004) Different cortical activations for subjects using allocentric or egocentric strategies in a virtual navigation task. *Neuroreport*, 15:135-40.
- Kim, H., Cabeza, R. (2009) Common and specific brain regions in high- versus low-confidence recognition memory. *Brain Res*, 1282:103-13.
- Kizilirmak, J.M., Thuerich, H., Folta-Schoofs, K., Schott, B.H., Richardson-Klavehn, A. (2016) Neural Correlates of Learning from Induced Insight: A Case for Reward-Based Episodic Encoding. *Front Psychol*, 7:1693.
- Klostermann, E.C., Kane, A.J.M., Shimamura, A.P. (2008) Parietal activation during retrieval of abstract and concrete auditory information. *Neuroimage*, 40:896-901.
- Klostermann, E.C., Loui, P., Shimamura, A.P. (2009) Activation of right parietal cortex during memory retrieval of nonlinguistic auditory stimuli. *Cogn Affect Behav Neurosci*, 9:242-8.
- Kompus, K., Eichele, T., Hugdahl, K., Nyberg, L. (2011) Multimodal imaging of incidental retrieval: the low route to memory. *J Cogn Neurosci*, 23:947-60.
- Kondo, Y., Suzuki, M., Mugikura, S., Abe, N., Takahashi, S., Iijima, T., Fujii, T. (2005) Changes in brain activation associated with use of a memory strategy: a functional MRI study. *Neuroimage*, 24:1154-63.
- Kwok, S.C., Macaluso, E. (2015) Immediate memory for "when, where and what": Short-delay retrieval using dynamic naturalistic material. *Hum Brain Mapp*, 36:2495-513.
- Kwok, S.C., Shallice, T., Macaluso, E. (2012) Functional anatomy of temporal organisation and domain-specificity of episodic memory retrieval. *Neuropsychologia*, 50:2943-55.
- Lambrey, S., Doeller, C., Berthoz, A., Burgess, N. (2012) Imagining being somewhere else: neural basis of changing perspective in space. *Cereb Cortex*, 22:166-74.
- Liu, Q., Dong, Q., Chen, C., Xue, G. (2014) Neural processes during encoding support durable memory. *Neuroimage*, 88:1-9.
- Lundstrom, B.N., Ingvar, M., Petersson, K.M. (2005) The role of precuneus and left inferior frontal cortex during source memory episodic retrieval. *Neuroimage*, 27:824-34.
- Lundstrom, B.N., Petersson, K.M., Andersson, J., Johansson, M., Fransson, P., Ingvar, M. (2003) Isolating the retrieval of imagined pictures during episodic memory: activation of the left precuneus and left prefrontal cortex. *Neuroimage*, 20:1934-43.
- Mack, M.L., Love, B.C., Preston, A.R. (2016) Dynamic updating of hippocampal object representations reflects new conceptual knowledge. *Proc Natl Acad Sci U S A*. 113:13203-13208.
- Madore, K.P., Szpunar, K.K., Addis, D.R., Schacter, D.L. (2016) Episodic specificity induction impacts activity in a core brain network during construction of imagined future experiences. *Proc Natl Acad Sci U S A*, 113:10696-701.

- Maillet, D., Rajah, M.N. (2016) Assessing the Neural Correlates of Task-unrelated Thoughts during Episodic Encoding and Their Association with Subsequent Memory in Young and Older Adults. *J Cogn Neurosci*, 28:826-41.
- Manelis, A., Popov, V., Paynter, C., Walsh, M., Wheeler, M.E., Vogt, K.M., Reder, L.M. (2017) Cortical Networks Involved in Memory for Temporal Order. *J Cogn Neurosci*, 29:1253-1266.
- McDermott, K.B., Gilmore, A.W., Nelson, S.M., Watson, J.M., Ojemann, J.G. (2017) The parietal memory network activates similarly for true and associative false recognition elicited via the DRM procedure. *Cortex*, 87:96-107.
- Minamoto, T., Osaka, M., Engle, R.W., Osaka, N. (2012) Incidental encoding of goal irrelevant information is associated with insufficient engagement of the dorsal frontal cortex and the inferior parietal cortex. *Brain Res*, 1429:82-97.
- Morcom, A.M., Rugg, M.D. (2012) Retrieval orientation and the control of recollection: an fMRI study. *J Cogn Neurosci*, 24:2372-84.
- Nadel, L., Campbell, J., Ryan, L. (2007) Autobiographical memory retrieval and hippocampal activation as a function of repetition and the passage of time. *Neural Plast*, 2007:90472.
- Nelson, S.M., Arnold, K.M., Gilmore, A.W., McDermott, K.B. (2013) Neural signatures of test-potentiated learning in parietal cortex. *J Neurosci*, 33:11754-62.
- Otten, L.J., Henson, R.N., Rugg, M.D. (2002) State-related and item-related neural correlates of successful memory encoding. *Nat Neurosci*, 5:1339-44.
- Phillips, J.S., Velanova, K., Wolk, D.A., Wheeler, M.E. (2009) Left posterior parietal cortex participates in both task preparation and episodic retrieval. *Neuroimage*, 46:1209-21.
- Pollmann, S., Weidner, R., Humphreys, G.W., Olivers, C.N., Muller, K., Lohmann, G., Wiggins, C.J., Watson, D.G. (2003) Separating distractor rejection and target detection in posterior parietal cortex—an event-related fMRI study of visual marking. *Neuroimage*, 18:310-23.
- Raposo, A., Frade, S., Alves, M. (2016) Framing memories: How the retrieval query format shapes the neural bases of remembering. *Neuropsychologia*, 89:309-319.
- Reas, E.T., Brewer, J.B. (2013) Retrieval search and strength evoke dissociable brain activity during episodic memory recall. *J Cogn Neurosci*, 25:219-33.
- Rekkas, P.V., Constable, R.T. (2005) Evidence that autobiographic memory retrieval does not become independent of the hippocampus: an fMRI study contrasting very recent with remote events. *J Cogn Neurosci*, 17:1950-61.
- Rescorla, R.A., Wagner, A.R. (1972) A theory of Pavlovian conditioning: Variations in the effectiveness of reinforcement and nonreinforcement. In: *Classical Conditioning II: Current Research and Theory* (Eds Black, A.H., Prokasy, W.F.) New York: Appleton Century Crofts, pp. 64-99.
- Richter, F.R., Cooper, R.A., Bays, P.M., Simons, J.S. (2016) Distinct neural mechanisms underlie the success, precision, and vividness of episodic memory. *Elife*, 5.
- Rosen, M.L., Stern, C.E., Devaney, K.J., Somers, D.C. (2018) Cortical and Subcortical Contributions to Long-Term Memory-Guided Visuospatial Attention. *Cereb Cortex*, 28:2935-2947.
- Rousselet, G.A., Pernet, C.R. (2012) Improving standards in brain-behavior correlation analyses. *Front Hum Neurosci*, 6:119.
- Satterthwaite, T.D., Elliott, M.A., Gerraty, R.T., Ruparel, K., Loughhead, J., Calkins, M.E., Eickhoff, S.B., Hakonarson, H., Gur, R.C., Gur, R.E., Wolf, D.H. (2012) An improved framework for confound regression and filtering for control of motion artifact in the preprocessing of resting-state functional connectivity data. *NeuroImage* 64C:240-56.
- Schinazi, V.R., Epstein, R.A. (2010) Neural correlates of real-world route learning. *Neuroimage*, 53:725-35.
- Schott, B.H., Henson, R.N., Richardson-Klavehn, A., Becker, C., Thoma, V., Heinze, H.J., Duzel, E. (2005) Redefining implicit and explicit memory: the functional neuroanatomy of priming, remembering, and control of retrieval. *Proc Natl Acad Sci U S A*, 102:1257-62.
- Schott, B.H., Wustenberg, T., Wimber, M., Fenker, D.B., Zierhut, K.C., Seidenbecher, C.I., Heinze, H.J., Walter, H., Duzel, E., Richardson-Klavehn, A. (2013) The relationship between level of

- processing and hippocampal-cortical functional connectivity during episodic memory formation in humans. *Hum Brain Mapp*, 34:407-24.
- Schwarzkopf, D.S., De Haas, B., Rees, G. (2012) Better ways to improve standards in brain-behavior correlation analysis. *Front Hum Neurosci*, 6:200.
- Sestieri, C., Corbetta, M., Romani, G.L., Shulman, G.L. (2011) Episodic memory retrieval, parietal cortex, and the default mode network: functional and topographic analyses. *J Neurosci*, 31:4407-20.
- Sheldon, S., Levine, B. (2018) The medial temporal lobe functional connectivity patterns associated with forming different mental representations. *Hippocampus*, 28:269-280.
- Shelton, A.L., Gabrieli, J.D. (2002) Neural correlates of encoding space from route and survey perspectives. *J Neurosci*, 22:2711-7.
- Smith, C.N., Squire, L.R. (2009) Medial temporal lobe activity during retrieval of semantic memory is related to the age of the memory. *J Neurosci*, 29:930-8.
- Sommer, T. (2017) The Emergence of Knowledge and How it Supports the Memory for Novel Related Information. *Cereb Cortex*, 27:1906-1921.
- Sommer, T., Rose, M., Buchel, C. (2006) Dissociable parietal systems for primacy and subsequent memory effects. *Neurobiol Learn Mem*, 85:243-51.
- Sommer, T., Rose, M., Weiller, C., Buchel, C. (2005) Contributions of occipital, parietal and parahippocampal cortex to encoding of object-location associations. *Neuropsychologia*, 43:732-43.
- St Jacques, P.L., Carpenter, A.C., Szpunar, K.K., Schacter, D.L. (2018) Remembering and imagining alternative versions of the personal past. *Neuropsychologia*, 110:170-179.
- St Jacques, P.L., Szpunar, K.K., Schacter, D.L. (2017) Shifting visual perspective during retrieval shapes autobiographical memories. *Neuroimage*, 148:103-114.
- Stock, O., Roder, B., Burke, M., Bien, S., Rosler, F. (2009) Cortical activation patterns during long-term memory retrieval of visually or haptically encoded objects and locations. *J Cogn Neurosci*, 21:58-82.
- Sugiura, M., Sassa, Y., Watanabe, J., Akitsuki, Y., Maeda, Y., Matsue, Y., Kawashima, R. (2009) Anatomical segregation of representations of personally familiar and famous people in the temporal and parietal cortices. *J Cogn Neurosci*, 21:1855-68.
- Sugiura, M., Shah, N.J., Zilles, K., Fink, G.R. (2005) Cortical representations of personally familiar objects and places: functional organization of the human posterior cingulate cortex. *J Cogn Neurosci*, 17:183-98.
- Takahashi, E., Ohki, K., Kim, D.S. (2008) Dissociated pathways for successful memory retrieval from the human parietal cortex: anatomical and functional connectivity analyses. *Cereb Cortex*, 18:1771-8.
- Takashima, A., Nieuwenhuis, I.L., Rijpkema, M., Petersson, K.M., Jensen, O., Fernandez, G. (2007) Memory trace stabilization leads to large-scale changes in the retrieval network: a functional MRI study on associative memory. *Learn Mem*, 14:472-9.
- Trinkler, I., King, J.A., Doeller, C.F., Rugg, M.D., Burgess, N. (2009) Neural bases of autobiographical support for episodic recollection of faces. *Hippocampus*, 19:718-30.
- Tzourio-Mazoyer, N., Landeau, B., Papathanassiou, D., Crivello, F., Etard, O., Delcroix, N., Mazoyer, B., Joliot, M. (2002) Automated anatomical labeling of activations in SPM using a macroscopic anatomical parcellation of the MNI MRI single-subject brain. *Neuroimage*, 15:273-89.
- Uncapher, M.R., Otten, L.J., Rugg, M.D. (2006) Episodic encoding is more than the sum of its parts: an fMRI investigation of multifeature contextual encoding. *Neuron*, 52:547-56.
- Uncapher, M.R., Rugg, M.D. (2005) Effects of divided attention on fMRI correlates of memory encoding. *J Cogn Neurosci*, 17:1923-35.
- Uncapher, M.R., Rugg, M.D. (2009) Selecting for memory? The influence of selective attention on the mnemonic binding of contextual information. *J Neurosci*, 29:8270-9.
- van Assche, M., Kebets, V., Vuilleumier, P., Assal, F. (2016) Functional Dissociations Within Posterior Parietal Cortex During Scene Integration and Viewpoint Changes. *Cereb Cortex*, 26:586-598.

- van Buuren, M., Kroes, M.C., Wagner, I.C., Genzel, L., Morris, R.G., Fernandez, G. (2014) Initial investigation of the effects of an experimentally learned schema on spatial associative memory in humans. *J Neurosci*, 34:16662-70.
- van der Linden, M., Berkers, R., Morris, R.G.M., Fernandez, G. (2017) Angular Gyrus Involvement at Encoding and Retrieval Is Associated with Durable But Less Specific Memories. *J Neurosci*, 37:9474-9485.
- van Kesteren, M.T., Beul, S.F., Takashima, A., Henson, R.N., Ruitter, D.J., Fernandez, G. (2013) Differential roles for medial prefrontal and medial temporal cortices in schema-dependent encoding: from congruent to incongruent. *Neuropsychologia*, 51:2352-9.
- van Kesteren, M.T., Fernandez, G., Norris, D.G., Hermans, E.J. (2010) Persistent schema-dependent hippocampal-neocortical connectivity during memory encoding and postencoding rest in humans. *Proc Natl Acad Sci U S A*, 107:7550-5.
- van Kesteren, M.T., Rijpkema, M., Ruitter, D.J., Morris, R.G., Fernandez, G. (2014) Building on prior knowledge: schema-dependent encoding processes relate to academic performance. *J Cogn Neurosci*, 26:2250-61.
- van Mulukom, V., Schacter, D.L., Corballis, M.C., Addis, D.R. (2013) Re-imagining the future: repetition decreases hippocampal involvement in future simulation. *PLoS One*, 8:e69596.
- Verde, M.F. (2013) Retrieval-induced forgetting in recall: Competitor interference revisited. *Journal of Experimental Psychology. Learning, Memory, and Cognition* 39:1433–1448.
- Vilberg, K.L., Rugg, M.D. (2009) An investigation of the effects of relative probability of old and new test items on the neural correlates of successful and unsuccessful source memory. *Neuroimage*, 45:562-71.
- von Zerssen, G.C., Mecklinger, A., Opitz, B., von Cramon, D.Y. (2001) Conscious recollection and illusory recognition: an event-related fMRI study. *Eur J Neurosci*, 13:2148-56.
- Vul, E., Harris, C., Winkielman, P., Pashler, H. (2009) Puzzlingly High Correlations in fMRI Studies of Emotion, Personality, and Social Cognition. *Perspectives on Psychological Science* 4:274.290.
- Weymar, M., Bradley, M.M., Sege, C.T., Lang, P.J. (2018) Neural activation and memory for natural scenes: Explicit and spontaneous retrieval. *Psychophysiology*:e13197.
- Wimber, M., Bauml, K.H., Bergstrom, Z., Markopoulos, G., Heinze, H.J., Richardson-Klavehn, A. (2008) Neural markers of inhibition in human memory retrieval. *J Neurosci*, 28:13419-27.
- Wimber, M., Heinze, H.J., Richardson-Klavehn, A. (2010) Distinct frontoparietal networks set the stage for later perceptual identification priming and episodic recognition memory. *J Neurosci*, 30:13272-80.
- Wimber, M., Schott, B.H., Wendler, F., Seidenbecher, C.I., Behnisch, G., Macharadze, T., Bäuml, K.H., Richardson-Klavehn, A. (2011) Prefrontal dopamine and the dynamic control of human long-term memory. *Transl Psychiatry* 1:e15.
- Wright, A.A., Santiago, H.C., Sands, S.F., Kendrick, D.F., Cook, R.G. (1985) Memory processing of serial lists by pigeons, monkeys, and people. *Science* 229:287-289.
- Yamawaki, R., Nakamura, K., Aso, T., Shigemune, Y., Fukuyama, H., Tsukiura, T. (2017) Remembering my friends: Medial prefrontal and hippocampal contributions to the self-reference effect on face memories in a social context. *Hum Brain Mapp*, 38:4256-4269.
- Yang, P., Fan, C., Wang, M., Fogelson, N., Li, L. (2017) The effects of changes in object location on object identity detection: A simultaneous EEG-fMRI study. *Neuroimage*, 157:351-363.
- Yarkoni, T. (2009) Big Correlations in Little Studies: Inflated fMRI Correlations Reflect Low Statistical Power-Commentary on Vul et al. (2009). *Perspect Psychol Sci*, 4:294-8.
- Yonelinas, A.P., Otten, L.J., Shaw, K.N., Rugg, M.D. (2005) Separating the brain regions involved in recollection and familiarity in recognition memory. *J Neurosci*, 25:3002-8.
- Yu, Q., Shim, W.M. (2017) Occipital, parietal, and frontal cortices selectively maintain task-relevant features of multi-feature objects in visual working memory. *Neuroimage*, 157:97-107.
- Zeithamova, D., Maddox, W.T., Schnyer, D.M. (2008) Dissociable prototype learning systems: evidence from brain imaging and behavior. *J Neurosci*, 28:13194-201.
